# Supplementary material for: Compensatory growth and understory soil stoichiometric features of Hippophae rhamnoides at different stubble heights
Source: PeerJ. 2022 Jul 14;10:e13363. doi: 10.7717/peerj.13363 (PMC9288824; doi:10.7717/peerj.13363)
Supplement: Data S1 [file peerj-10-13363-s001.xlsx]

## Sheet: Sheet1
	Stubble height	Soil moisture content	Soil bulk density	Total porosity	PH	Water-holding capacity(%)	GH	GB
1	0	12.36	1.81	30.2807	8.92	18.94	1.31	1.14
1	0	10.87	1.74	39.0292	8.71	17.68	1.29	1.15
1	0	8.94	1.73	34.5615	8.7	10.35	1.34	1.1
1	0	6.54	1.71	40.3078	8.49	10.35	1.32	1.12
2	10	11.99	1.58	44.9402	8.68	15.83	1.37	1.1
2	10	11.35	1.58	40.5393	8.57	15.68	1.36	1.19
2	10	11.21	1.55	41.5024	8.55	14.24	1.34	1.21
2	10	9.89	1.54	41.9212	8.54	12.61	1.32	1.23
3	15	11.95	1.65	48.2672	8.54	21.22	1.44	1.24
3	15	11.75	1.56	48.3217	8.53	19.18	1.47	1.24
3	15	11.65	1.41	48.4343	8.48	15.92	1.48	1.22
3	15	11.36	1.4	47.5824	8.43	8.44	1.42	1.25
4	20	9.34	1.83	37.6729	8.75	14.02	1.23	1.15
4	20	7.31	1.82	34.6581	8.76	13.55	1.24	1.14
4	20	5.95	1.76	35.2542	8.76	11.45	1.21	1.16
4	20	4.67	1.67	34.3506	8.79	11.06	1.19	1.16
5	1	6.52	1.95	36.8838	8.94	11.44	1	1
5	1	5.79	1.85	31.3228	8.88	11.27	1	1
5	1	4.26	1.73	39.4598	8.86	10.4	1	1
5	1	4.18	1.62	33.4501	8.82	10.16	1	1

## Sheet: Sheet2
	Stubble height	K	P	N	SOC	C：N	C：P	N:P
1	0	17.86	0.26	0.65	6.26	9.63077	24.0769	2.5
1	0	16.71	0.25	0.6	6.23	10.3833	24.92	2.4
1	0	16.38	0.24	0.52	5.68	10.9231	23.6667	2.16667
1	0	16.52	0.21	0.51	5.48	10.7451	26.0952	2.42857
2	10	20.78	0.36	0.7	7.23	10.3286	20.0833	1.94444
2	10	20.01	0.35	0.65	7.13	10.9692	20.3714	1.85714
2	10	19.34	0.32	0.6	6.45	10.75	20.1562	1.875
2	10	19.52	0.29	0.53	6.44	12.1509	22.2069	1.82759
3	15	21.86	0.39	0.75	7.63	10.1733	19.5641	1.92308
3	15	21.05	0.37	0.67	6.95	10.3731	18.7838	1.81081
3	15	20.68	0.35	0.64	6.7	10.4688	19.1429	1.82857
3	15	20.81	0.32	0.57	6.59	11.5614	20.5938	1.78125
4	20	16.67	0.24	0.6	5.26	8.76667	21.9167	2.5
4	20	16.02	0.22	0.53	5.16	9.73585	23.4545	2.40909
4	20	15.67	0.22	0.48	4.95	10.3125	22.5	2.18182
4	20	15.43	0.2	0.42	4.9	11.6667	24.5	2.1
5	1	15.2	0.2	0.53	5.03	9.49057	25.15	2.65
5	1	13.55	0.19	0.5	5.02	10.04	26.4211	2.63158
5	1	12.98	0.17	0.48	5.01	10.4375	29.4706	2.82353
5	1	13.31	0.16	0.45	4.81	10.6889	30.0625	2.8125
